# Supplementary material
Source: Elsevier journal article supplement (https://www.sciencedirect.com/science/article/pii/S0213911113000502)
Supplement: mmc1 [file S0213911113000502:mmc1.docx]

**Appendix**

**Table I**

Population fractions (PF) and population fraction ratios (PFR) for sex by age group according to recruitment strategy.

|  | Age group | 18-24 | | 25-34 | | 35-44 | | 45-54 | | 55-65 | |
| --- | --- | --- | --- | --- | --- | --- | --- | --- | --- | --- | --- |
|  | Sex | Male | Female | Male | Female | Male | Female | Male | Female | Male | Female |
| Recruitment Strategy |  | PF (‰) | PF (‰) | PF (‰) | PF (‰) | PF (‰) | PF (‰) | PF (‰) | PF (‰) | PF (‰) | PF (‰) |
| Municipal/ National Registries | Belgium | 1.43 | 1.87 | 0.76 | 1.13 | 0.81 | 1.94 | 2.33 | 1.83 | 2.95 | 2.30 |
| PFR | 0.8 | | 0.7 | | 0.4 | | 1.3 | | 1.3 | |
| Germany | 0.92 | 1.18 | 1.04 | 1.45 | 1.02 | 1.84 | 1.26 | 1.84 | 1.87 | 1.84 |
| PFR | 0.8 | | 0.7 | | 0.6 | | 0.7 | | 1.0 | |
| Spain | 0.18 | 0.29 | 0.16 | 0.27 | 0.24 | 0.25 | 0.20 | 0.25 | 0.23 | 0.31 |
| PFR | 0.6 | | 0.6 | | 1.0 | | 0.8 | | 0.8 | |
| Sweden | 5.31 | 13.85 | 8.88 | 17.98 | 12.02 | 20.43 | 15.79 | 21.19 | 4.40 | 6.68 |
| PFR | 0.4 | | 0.5 | | 0.6 | | 0.7 | | 0.7 | |
| Random Route | Greece | 1.04 | 0.97 | 1.03 | 0.96 | 1.05 | 1.05 | 1.02 | 1.01 | 1.03 | 0.97 |
| PFR | 1.1 | | 1.1 | | 1.0 | | 1.0 | | 1.1 | |
| Hungary | 0.57 | 0.69 | 0.38 | 0.54 | 0.66 | 0.68 | 0.31 | 0.53 | 0.51 | 0.66 |
| PFR | 0.8 | | 0.7 | | 1.0 | | 0.6 | | 0.8 | |
| Electoral Registries + other (RDD and via public) | Portugal | 2.44 | 4.31 | 1.29 | 2.55 | 3.09 | 3.76 | 4.89 | 5.36 | 6.05 | 11.05 |
| PFR | 0.6 | | 0.5 | | 0.8 | | 0.9 | | 0.5 | |
| United Kingdom | 1.18 | 1.73 | 1.22 | 1.17 | 1.09 | 1.20 | 1.07 | 1.30 | 1.11 | 0.97 |
| PFR | 0.7 | | 1.0 | | 0.9 | | 0.8 | | 1.1 | |

**Table II**

Population fractions (PF) and population fraction ratios (PFR) for education level by age group according to recruitment strategy.

| Age group |  | 18-24 | | 25-34 | | 35-44 | | 45-54 | | 55-65 | |
| --- | --- | --- | --- | --- | --- | --- | --- | --- | --- | --- | --- |
| Education level |  | Primary to secondary | University | Primary to secondary | University | Primary to secondary | University | Primary to secondary | University | Primary to secondary | University |
| Recruitment Strategy |  | PF (‰) | PF (‰) | PF (‰) | PF (‰) | PF (‰) | PF (‰) | PF (‰) | PF (‰) | PF (‰) | PF (‰) |
| Municipal/  National Registries | Belgium | 0.01 | 0.14 | 0.01 | 0.05 | 0.01 | 0.06 | 0.02 | 0.09 | 0.03 | 0.10 |
| PFR | 0.09 | | 0.23 | | 0.15 | | 0.20 | | 0.22 | |
| Germany | 0.01 | 0.05 | 0.00 | 0.03 | 0.01 | 0.02 | 0.01 | 0.02 | 0.01 | 0.02 |
| PFR | 0.12 | | 0.14 | | 0.26 | | 0.37 | | 0.33 | |
| Spain | 0.00 | 0.03 | 0.00 | 0.01 | 0.00 | 0.01 | 0.00 | 0.01 | 0.00 | 0.01 |
| PFR | 0.08 | | 0.15 | | 0.29 | | 0.20 | | 0.33 | |
| Sweden | 0.04 | 0.41 | 0.07 | 0.11 | 0.04 | 0.19 | 0.09 | 0.16 | 0.10 | 0.23 |
| PFR | 0.10 | | 0.65 | | 0.22 | | 0.56 | | 0.45 | |
| Random Route | Greece | 0.10 | 0.29 | 0.08 | 0.12 | 0.06 | 0.11 | 0.06 | 0.10 | 0.05 | 0.12 |
| PFR | 0.36 | | 0.63 | | 0.57 | | 0.62 | | 0.44 | |
| Hungary | 0.09 | 0.17 | 0.08 | 0.09 | 0.10 | 0.15 | 0.07 | 0.12 | 0.09 | 0.20 |
| PFR | 0.53 | | 0.92 | | 0.66 | | 0.53 | | 0.46 | |
| Electoral Registry + other | Portugal | 0.04 | 0.27 | 0.02 | 0.11 | 0.03 | 0.24 | 0.07 | 0.38 | 0.15 | 0.89 |
| PFR | 0.17 | | 0.15 | | 0.14 | | 0.19 | | 0.17 | |
| United Kingdom | 0.01 | 0.06 | 0.01 | 0.03 | 0.01 | 0.03 | 0.01 | 0.02 | 0.01 | 0.02 |
| PFR | 0.10 | | 0.31 | | 0.38 | | 0.64 | | 0.54 | |

Primary to secondary correspond to ISCED groups 1 through 4; University correspond to ISCED groups 5 and 6.
